# Supplementary material
Source: PubMed Central journal article supplement (PMC2220054)
Supplement: NIHMS38025-supplement-supplement.pdf [file NIHMS38025-supplement-supplement.pdf]

## Supplementary Material

### Description of the class *Mollicutes*

There are currently four orders, five families and eight genera assigned to the class *Mollicutes*. Three of the genera (*Mycoplasma*, *Entomoplasma* and *Mesoplasma*) are polyphyletic. Almost all mollicutes are commensals or pathogens of eukaryotic hosts. Their major characteristics are their wall-lessness, the simplicity of their genomes compared with those of most walled bacteria and 16S rRNA gene sequences that clearly identify them as species of the *Mollicutes*. All are referable to a phylogenetic group and/or cluster within an established genus (Weisburg *et al.*, 1989; Johansson & Pettersson, 2002; Gasparich *et al.*, 2004). Members of the class are believed to have evolved from ancestors shared with walled, low-G+C-content Gram-positive bacteria such as *Clostridium* or *Erysipelothrix* species (Fox *et al.*, 1980; Woese *et al.*, 1980; Weisburg *et al.*, 1989), but mollicutes lack cell wall and/or muramic or diaminopimelic acid synthesis pathways (Plackett, 1959; Schleifer & Kandler, 1972; Martin *et al.*, 1980). The DNA base compositions of mollicutes resemble those of related bacteria, 23–34 mol% G+C in most cases but as high as 40 mol% G+C in *Mycoplasma pneumoniae*. Their genome sizes are 580–2200 kbp, smaller than those of most walled bacteria. Cells of mollicutes are bounded only by a single membrane (Boatman, 1979; Cole, 1983). Despite the lack of a cell wall, cytoskeletal elements present in many species (Williamson, 1974; Williamson *et al.*, 1984; Stevens & Krause, 1992; Krause, 1996, 1998; Krause *et al.*, 1997; Trachtenberg, 1998; Kürner *et al.*, 2005) permit helicity, motility and various types of polarity. Spiroplasmas are helical mollicutes recognizable by dark-field microscopy in the earliest passages (Davis & Worley, 1973; Williamson & Whitcomb, 1974) or even in host tissue or fluids prior to culture (Whitcomb & Williamson, 1975; Williamson & Poulson, 1979; Bové & Garnier, 1997; Fletcher *et al.*, 1998). Spiroplasmas have structural features that may exhibit considerable change during their life in culture (Williamson *et al.*, 1989; Gasparich *et al.*, 2004). In the pneumoniae group of *Mycoplasma*, the *Mycoplasma sualvi* cluster of the hominis group and perhaps other clusters, cells may have terminal structures or may appear in electron micrographs to be flask-shaped (Del Giudice *et al.*, 1985; Lo *et al.*, 1992; Trachtenberg, 1998; Frasca *et al.*, 2005). The cell surfaces of some *Mycoplasma* species have terminal structures (Biberfeld & Biberfeld, 1970; Del Giudice *et al.*, 1985) composed in part of adhesin proteins that mediate mollicute attachment to surfaces of eukaryotic cells (Razin & Jacobs, 1992). Attachment structures have also been demonstrated in *Spiroplasma* (Ammar *et al.*, 2004).

Some mollicutes with complex cytoskeletal features are motile. Spiroplasmas exhibit rotatory, flexional and/or translational motility readily observed under

dark-field microscopy (Williamson & Poulson, 1979; Williamson & Whitcomb, 1974; Tully, 1983; Trachtenberg & Gilad, 2001; Shaevitz *et al.*, 2005). Several *Mycoplasma* species are capable of gliding motility (Bredt, 1968; Bredt & Radestock, 1977; Kirchhoff & Rosengarten, 1984; Kirchhoff, 1992; Miyata *et al.*, 2000, 2002; Shimizu & Miyata, 2002; Wolgemuth & Charon, 2005), which can be observed only with specialized equipment. Motility of spiroplasmas is associated with chemotaxis (Daniels *et al.*, 1980; Daniels & Longland, 1984).

The complex cell structure in the pneumoniae group, which may be the most plesiomorphic (primitive) group in *Mycoplasma*, seems to have been lost in most clusters of the hominis group. This simplification correlates with moderately smaller genome sizes. In the hominis group, contractile movements have been observed in a few species (Bredt *et al.*, 1973), although no cytoskeletal complexity has been noted. 'Rho structures' of unknown function or significance have been observed by electron microscopy in species of the mycoides cluster (Peterson *et al.*, 1973; Rodwell *et al.*, 1975), but most species in that cluster, as viewed in cultures, appear as relatively unstructured filaments.

The absence of a cell wall and apparent lack of cytoskeletal elements in many *Mycoplasma* species is expressed in a general pleomorphism. Structurally simple cells observed by phase (Bredt, 1983) or dark-field (Tully, 1983) microscopy vary in shape: some are coccoidal, others filamentous. In a minority of non-helical species, there is a tendency for filaments to produce branched structures, fragmented filamentous forms and what appear to be buds. Binary fission is sometimes observed and, in some species, particularly acholeplasmas, dyads or tetrads may be observed by light microscopy. Cells of some species appear to be encapsulated (Almeida & Rosenbusch, 1991). Mollicute cells can be very small; the diameters of some viable coccoidal cells are as small as 300 nm and viable helical filaments of *Spiroplasma* species can be as narrow as 200 nm in diameter. The small size of mollicute cells and their lack of a cell wall enable them to pass through 450 and, to a lesser extent, 220 nm filters. Cells of *Mycoplasma neurolyticum* from young cultures often pass 100 nm filter pores, but this is an exception. Cell shape appears to depend on the age of the culture and to some extent on the nutritional qualities and/or the osmotic pressure of the medium (Garnier *et al.*, 1981, 1984; Gasparich *et al.*, 2004). The replication of the genome is not necessarily synchronized with cell division. Details of the mollicute growth cycle may reflect to some extent the presence of cytoskeletal elements (Miyata & Seto, 1999). Although neither spores nor walled stages are known, certain morphological adaptations are thought to represent resting stages (Hackett *et al.*, 1996). All described species can be grown on artificial cell-free

media of diverse complexity, and cultivation is a fundamental requirement for species description.

The intermediary metabolism of mollicutes is influenced by their wall-lessness and their parasitic or commensal life style (Pollack *et al.*, 1997). Their energy pathways are moderately conserved and provide a character that is significant at the cluster level. Members of the *Entomoplasmatales* and *Acholeplasmatales* invariably utilize glucose as an energy source (Pollack, 1992), but *Mycoplasma* species differ in this respect. Some produce acid from glucose, but others do not. Some *Mycoplasma* species use arginine as an alternative energy source, but a small group of apomorphic (highly evolved) species utilize neither glucose nor arginine (Taylor *et al.*, 1994). *Ureaplasma* species generate ATP through a system coupled to urea hydrolysis by a cytosolic urease (Smith *et al.*, 1993).

Mollicutes have coevolved (Maniloff, 2002) and are closely associated with fish (Kirchhoff *et al.*, 1987; Holben *et al.*, 2002), reptiles (Brown, 2002), birds (Al-Ankari & Bradbury, 1996) and terrestrial and aquatic mammals. The lack of any data from amphibians remains a significant omission in the mycoplasmaology of vertebrate hosts. Mollicutes are also associated with invertebrates and plants (Gasparich *et al.*, 2004). As a result, their biological properties (e.g. temperature requirements) tend to reflect their host relationships (Hackett & Clark, 1989). Mollicutes may be commensals or frank or opportunistic pathogens (Razin, 1998; Razin & Barile, 1985). Certain species are proven aetiological agents of diseases of vertebrates or invertebrates and suspected agents of plant diseases (Whitcomb & Tully, 1979, 1989). Certain *Acholeplasma* and *Mycoplasma* species are frequent contaminants in cell culture systems (Del Giudice & Tully, 1996).

Many mollicutes have not yet been cultivated. The majority of these are phytoplasmas (Christensen *et al.*, 2005). Haemotrophic members of the genera *Haemobartonella* and *Eperythrozoon*, originally classified as rickettsias, have been shown by 16S rRNA gene sequencing techniques to be referable to *Mollicutes* (Neimark & Kocan, 1997; Johansson *et al.*, 1999; Neimark *et al.*, 2001, 2002a, b; List Editor, IJSEM, 2002). Some species that are commensals or pathogens in vertebrates (other than the haemoplasmas) have not been cultivated (Neimark *et al.*, 1998). Another group not yet cultivated are insect commensals that have been identified on the basis of PCR-amplified sequences. Some of these induce sex-ratio abnormalities and probably benefit their hosts (Hurst *et al.*, 1999; Hurst & Jiggins, 2000; Jiggins *et al.*, 2000; Fukatsu *et al.*, 2001). Experience has shown that a small fraction of mollicutes thought to be non-cultivable may eventually be cultivated in special media or circumstances (Del Giudice *et al.*, 1980; Hackett & Lynn, 1985; Hackett *et al.*, 1986). The vast majority of plant-pathogenic mollicutes, previously termed 'mycoplasma-like organisms' (Doi *et al.*, 1967; McCoy *et al.*, 1989), are now properly called

phytoplasmas (Sears & Kirkpatrick, 1994; IRPCM Phytoplasma/Spiroplasma Working Team, 2004). A few *Spiroplasma* species are also plant pathogens (Chen & Liao, 1975; Williamson & Whitcomb, 1975; Saillard *et al.*, 1987; Bové, 1997). Both of these types of plant pathogens are maintained in biological cycles involving the phloem of their host plants and their homopterous insect vectors. Phylogenetic studies based on the 16S rRNA gene and other genes have determined that phytoplasmas branched from the anaeroplasma-acholeplasma lineage and belong to the class *Mollicutes* (Lim & Sears, 1992; Johansson & Pettersson, 2002). Formal classification of phytoplasmas, using the criteria and methods adopted for other mollicutes, has been constrained by the fact that they have not yet been cultivated *in vitro* despite attempts to do so in many laboratories. Their genomes are much smaller than those of acholeplasmas, and they lack many metabolic capabilities (Oshima *et al.*, 2004). Consequently, phytoplasma characterization is incomplete. Murray & Stackebrandt (1995) proposed provisional 'Candidatus' taxonomic status for non-cultivable organisms that have been partially characterized and for which specific genomic (chiefly 16S rRNA gene sequence) and phenotypic characteristics have been determined, so the phytoplasmas are presently classified within the provisional genus 'Candidatus Phytoplasma'. In the last few years, substantial effort has been devoted to the analysis of their genomes and as a result two complete genomes have been sequenced and published (Oshima *et al.*, 2004; Bai *et al.*, 2006). More genome sequences are expected to be completed in the near future. The additional data provided by comparative analysis of the genomes of several organisms in this taxon will be of significant value in confirming unequivocally the position of the genus within the class and in further refining their taxonomic interrelationships. Although the phytoplasmas cannot be classified according to the minimal standards established in this document, their formal recognition as species is imminent, implying that either a broader definition of standards or alternative criteria for description of certain novel members of the class will be required to accommodate these as yet-uncultivated organisms.

**(i) The order *Mycoplasmatales* and family *Mycoplasmataceae*.** The order *Mycoplasmatales* presently contains the single family *Mycoplasmataceae*. This family and its type genus *Mycoplasma* are polyphyletic. The genus *Mycoplasma* is divided into three phylogenetic groups, the mycoides, hominis and pneumoniae groups (Johansson & Pettersson, 2002). The mycoides group contains the type species of the genus, *Mycoplasma mycoides*, of which the subspecies *mycoides* is an important pathogen of ruminant animals. It is one of six *Mycoplasma* species discovered to date whose 16S rRNA gene sequences cluster within those of the family *Entomoplasmataceae*. Because of that anomaly, the proper taxonomic assignment of these species is a matter of current controversy. The pneumoniae group

---

**Brown, D. R., Whitcomb, R. F. & Bradbury, J. M. (2007).** Revised minimal standards for description of new species of the class *Mollicutes* (division *Tenericutes*). *Int J Syst Evol Microbiol* **57**, 2703–2719.

is technically paraphyletic but for purposes of classification can be considered to be part of a clade that also includes the hominis group. The orders *Mycoplasmatales* and *Entomoplasmatales* form a clade deeply split from the *Acholeplasmatales*, *Anaeroplasmatales* and 'Candidatus Phytoplasma' (Woese *et al.*, 1980; Johansson & Pettersson, 2002; Gasparich *et al.*, 2004). At present, this split is not recognized by a hierarchical name. Although only a few members of the *Mycoplasmatales* have been examined in this respect, all apparently utilize UGA as a tryptophan (W) codon rather than a stop codon (Yamao *et al.*, 1985; Renaudin *et al.*, 1986; Blanchard, 1990; Citti *et al.*, 1992). UGA is the preferred W codon, but UGG is also used. The ratio between the usage of UGA and UGG tends to differ according to the G+C content of the genome (Rocha *et al.*, 1999). Members of the *Mycoplasmataceae* have, on rare occasions, been isolated from plants (Grau *et al.*, 1991) and insects (Kempf *et al.*, 2000). Similarly, members of the *Entomoplasmatales* have been isolated from vertebrate and invertebrate animals (Wang *et al.*, 2004, 2005; Nunan *et al.*, 2005). Several genera of non-helical mollicutes have been isolated from plants or insects. Therefore, although host association provides an important clue to an organism's identity, it is always necessary to examine the critical properties of a candidate organism to confirm a tentative placement (Pitcher & Nicholas, 2005). The clue to an unexpected occurrence will often be provided by 16S rRNA gene sequence analysis (Grau *et al.*, 1991).

**(ia) Genus *Mycoplasma*.** The following description applies to all three phylogenetic groups of mycoplasmas. *Mycoplasma* species are aerobic or facultatively anaerobic mollicutes isolated primarily or entirely from vertebrates or fluids of vertebrate origin such as serum. They require cholesterol and/or other sterols for growth, a need that is generally provided by serum in the culture medium. Their genome size is about 580–1360 kbp and the G+C content of their chromosome varies from 23 to 40 mol%. The differential utilization of glucose and arginine is an important feature of *Mycoplasma* species. Some species use one or the other of these two substrates, whereas others use both or neither. These patterns are moderately conserved, so the ability to utilize these substrates tends to characterize some mollicute clusters.

**(ib) Genus *Ureaplasma*.** The ureaplasmas form a clade that is a terminus in the pneumoniae group of *Mycoplasma*. The vast majority of ureaplasmas have been isolated from the urogenital tract of vertebrates. No other true reservoir is known or suspected. All species possess one or more ureases. Demonstration of urease activity is a minimum requirement for description of a novel *Ureaplasma* species. A standardized technique to demonstrate urea hydrolysis in mollicutes has been described (Razin, 1983). *Ureaplasma* species have general features similar to those of *Mycoplasma* species. Their genome sizes of 760–1170 kbp and G+C contents of 27–30 mol%

(Robertson *et al.*, 1990; Glass *et al.*, 2000) are similar to others in the pneumoniae group. Although no other mollicutes are known to hydrolyse urea, this test is mandatory for characterization of all non-helical mollicutes, since this property is a discriminatory phenotypic character.

**(ii) The order *Entomoplasmatales*.** The order *Entomoplasmatales* presently contains two families and three genera. With *Mycoplasmatales*, it is separated from other mollicute taxa by a deep split not presently recognized by a hierarchical name. As currently defined, the family *Entomoplasmataceae* and the genus *Spiroplasma* are paraphyletic, but this is not reflected in their nomenclature. Nomenclatural changes would be needed to eliminate this, but the reasons why the paraphyletic groups in this order have been tolerated are well substantiated (Weisburg *et al.*, 1989; Johansson & Pettersson, 2002; Gasparich *et al.*, 2004).

**(iia) The family *Spiroplasmataceae* and genus *Spiroplasma*.** The family *Spiroplasmataceae* is monotypic, so its characteristics are essentially those of the genus *Spiroplasma*. The genus is divided into three well-defined groups on the basis of 16S rRNA gene sequence analysis (Gasparich *et al.*, 2004). These are the ixodetis group, the citri-mirum group and the apis group. Spiroplasmas are helical, aerobic or facultatively anaerobic, usually motile mollicutes associated with invertebrates and/or plant surfaces or phloem. They have well-defined cytoskeletal features (Williamson *et al.*, 1984; Trachtenberg, 2004). They have genome sizes of about 780–2200 kbp. The G+C content of their chromosome varies from 25 to 32 mol% (Williamson *et al.*, 1998). In some clades (e.g. the citri-mirum group), the genome may carry a high content of non-coding, integrated viral or plasmid DNA (Renaudin & Bové, 1994; Melcher *et al.*, 1999). Repeat sequences also make up a significant part of the *Spiroplasma* genome (Nur *et al.*, 1986, 1987). A significant amount of the total DNA of *Spiroplasma* species occurs as free plasmids, which may be involved in gene transfer (Renaudin, 2002) and transmissibility by insects (Berho *et al.*, 2006).

**(iib) The genera of the family *Entomoplasmataceae*.** Members of the *Entomoplasmataceae* are non-helical mollicutes that are associated with invertebrates or plant surfaces. Members of this family are widely accepted to have evolved from spiroplasmal ancestors and, in so doing, to have lost helicity and motility. Species able to grow in the presence of 0.04% polyoxyethylene sorbitan are placed in the genus *Mesoplasma*, while other species unable to do so are placed in *Entomoplasma* (Tully *et al.*, 1993; Rose *et al.*, 1993). The genomes of known *Mesoplasma* species are about 790–1140 kbp and those of *Entomoplasma* are 870–1100 kbp in size. The G+C content of chromosomal DNA of known *Mesoplasma* species is 27–30 mol%, compared to 27–29 mol% for *Entomoplasma*. Furthermore, the 16S rRNA gene sequences of species of the two genera are very similar

(Weisburg *et al.*, 1989; Johansson & Pettersson, 2002; Gasparich *et al.*, 2004). Phylogenetic analyses of those sequences have indicated that both genera are polyphyletic (Weisburg *et al.*, 1989; Johansson & Pettersson, 2002; Gasparich *et al.*, 2004). *Mesoplasma* and *Entomoplasma* may thus represent a single taxon and may eventually be combined.

**(iii) The order *Acholeplasmatales*.** The *Acholeplasmataceae* is the single family in the order *Acholeplasmatales*. The family is monotypic, so its properties are essentially those of the genus *Acholeplasma*. *Acholeplasmas* are often provisionally recognized early in the characterization process, because the vast majority of them grow in serum-free media. Members of this genus are aerobic or facultatively anaerobic, structurally simple mollicutes from vertebrates, invertebrates or plants. Some cause disease in vertebrate animals. The ecology of *Acholeplasma* isolated from soils and sewage is not clear. Known *Acholeplasma* species grow well at 30–37 °C. They have genome sizes of about 1500–2100 kbp and G+C contents of 27–38 mol%. As far as is

known, *Acholeplasma* species always use UGG as a W codon.

**(iv) The order *Anaeroplasmatales*.** *Anaeroplasmatales* are obligately anaerobic bacteria that have been isolated from the bovine rumen (Robinson *et al.*, 1975; Robinson, 1983; Robinson & Freundt, 1987). Only a single family, the *Anaeroplasmataceae*, containing two genera, has been designated. The genus *Anaeroplasma* currently contains four species, each of which requires sterol. The genus *Asteroleplasma*, according to phylogenetic reconstructions, is not part of the monophyletic tree that comprises the remainder of the mollicutes (Weisburg *et al.*, 1989; Johansson & Pettersson, 2002; Gasparich *et al.*, 2004), but this placement is based on incomplete sequence data, and the true phylogenetic position is yet uncertain. The single known species, *Asteroleplasma anaerobium*, does not require sterol (Robinson *et al.*, 1975). The genome sizes in the two genera are similar (Robinson & Freundt, 1987) and are like those of many *Acholeplasma* species. However, the G+C content of chromosomal DNA in *Asteroleplasma* is about 40 mol%, in contrast to 29–34 mol% in *Anaeroplasma*.

## References

- Al-Ankari, A.-R. S. & Bradbury, J. M. (1996).** *Mycoplasma iowae*: a review. *Avian Pathol* **25**, 205–229.
- Almeida, R. A. & Rosenbusch, R. F. (1991).** Capsulelike surface material of *Mycoplasma dispar* induced by in vitro growth in culture within bovine cells is antigenically related to similar structures expressed in vivo. *Infect Immun* **59**, 3119–3125. [Medline](#)
- Ammar, el-D., Fulton, D., Bai, X., Meuler, T. & Hogenhout, S. A. (2004).** An attachment tip and pili-like structures in insect-and plant-pathogenic spiroplasmas of the class *Mollicutes*. *Arch Microbiol* **181**, 97–105.
- Bai, X., Zhang, J., Ewing, A., Miller, S. A., Jancso, R. A., Shevchenko, D. V., Tsukerman, K., Walunas, T., Lapidus, A. & other authors (2006).** Living with genome instability: the adaptation of phytoplasmas to diverse environments of their insect and plant hosts. *J Bacteriol* **188**, 3682–3696. [Medline](#)
- Berho, N., Duret, S. & Renaudin, J. (2006).** Absence of plasmids encoding adhesion-related proteins in non-insect-transmissible strains of *Spiroplasma citri*. *Microbiology* **152**, 873–876. [Medline](#)
- Biberfeld, G. & Biberfeld, P. (1970).** Ultrastructural features of *Mycoplasma pneumoniae*. *J Bacteriol* **102**, 855–861. [Medline](#)
- Blanchard, A. (1990).** *Ureaplasma urealyticum* urease genes: use of a UGA tryptophan codon. *Mol Microbiol* **4**, 669–676. [Medline](#)
- Boatman, E. S. (1979).** Morphology and ultrastructure of the *Mycoplasmatales*. In *The Mycoplasmas*, vol. 1, pp. 63–102. Edited by M. F. Barile & S. Razin. New York: Academic Press.
- Bové, J. M. (1997).** Spiroplasmas: infectious agents of plants, arthropods and vertebrates. *Wien Klin Wochenschr* **109**, 604–612. [Medline](#)
- Bové, J. M. & Garnier, M. (1997).** Walled and wall-less eubacteria from plants: sieve-tube-restricted plant pathogens. In *Developments in Plant Pathology*, vol. 12, *Pathogen and Microbial Contamination Management in Micropropagation*, pp. 45–60. Edited by A. C. Cassels. Dordrecht: Kluwer.
- Brown, D. R., Whitcomb, R. F. & Bradbury, J. M. (2007).** Revised minimal standards for description of new species of the class *Mollicutes* (division *Tenericutes*). *Int J Syst Evol Microbiol* **57**, 2703–2719.
- Bredt, W. (1968).** Motility and multiplication of *Mycoplasma pneumoniae*, a phase-contrast study. *Pathol Microbiol (Basel)* **32**, 321–326. [Medline](#)
- Bredt, W. (1983).** Phase-contrast microscopy. In *Methods in Mycoplasmaology*, vol. 1, pp. 31–33. Edited by S. Razin & J. G. Tully. New York: Academic Press.
- Bredt, W. & Radestock, U. (1977).** Gliding motility of *Mycoplasma pulmonis*. *J Bacteriol* **130**, 937–938. [Medline](#)
- Bredt, W., Heunert, H. H., Hofling, K. H. & Milthaler, B. (1973).** Microcinematographic studies of *Mycoplasma hominis* cells. *J Bacteriol* **113**, 1223–1227. [Medline](#)
- Brown, D. R. (2002).** Mycoplasmosis and immunity of fish and reptiles. *Front Biosci* **7**, d1338–d1346. [Medline](#)
- Chen, T. A. & Liao, C. H. (1975).** Corn stunt spiroplasma: isolation, cultivation, and proof of pathogenicity. *Science* **188**, 1015–1017. [Medline](#)
- Christensen, N. M., Axelsen, K. B., Nicolaisen, M. & Schulz, A. (2005).** Phytoplasmas and their interactions with hosts. *Trends Plant Sci* **10**, 526–535. [Medline](#)
- Citti, C., Marechal, D. L., Saillard, C., Weil, J. H. & Bové, J. M. (1992).** *Spiroplasma citri* UGG and UGA tryptophan codons, sequence of the two tryptophanyl-tRNAs and organization of the corresponding genes. *J Bacteriol* **174**, 6471–6478. [Medline](#)
- Cole, R. M. (1983).** Transmission electron microscopy. Basic techniques. In *Methods in Mycoplasmaology*, vol. 1, pp. 43–50. Edited by S. Razin & J. G. Tully. New York: Academic Press.
- Daniels, M. J. & Longland, J. M. (1984).** Chemotactic behavior of spiroplasmas. *Curr Microbiol* **10**, 191–193.
- Daniels, M. J., Longland, J. M. & Gilbert, J. (1980).** Aspects of motility and chemotaxis in spiroplasmas. *J Gen Microbiol* **118**, 429–436.
- Davis, R. E. & Worley, J. F. (1973).** Spiroplasma: motile, helical microorganism associated with corn stunt disease. *Phytopathology* **63**, 403–408.
- Del Giudice, R. A. & Tully, J. G. (1996).** Isolation of mycoplasmas from cell cultures by axenic cultivation

- techniques. In *Molecular and Diagnostic Procedures in Mycoplasmatology*, vol. 2, pp. 411–418. Edited by J. G. Tully & S. Razin. San Diego: Academic Press.
- Del Giudice, R. A., Gardella, R. S. & Hopps, H. E. (1980).** Cultivation of formerly non-cultivable strains of *Mycoplasma hyorhinitis*. *Curr Microbiol* **4**, 75–80.
- Del Giudice, R. A., Tully, J. G., Rose, D. L. & Cole, R. M. (1985).** *Mycoplasma pirum* sp. nov., a terminal structured mollicute from cell cultures. *Int J Syst Bacteriol* **35**, 285–291.
- Doi, Y., Terenaka, M., Yora, K. & Asuyama, H. (1967).** Mycoplasma or PTL group-like microorganisms found in the phloem elements of plants infected with mulberry dwarf, potato witches' broom, aster yellows or paulownia witches' broom. *Ann Phytopathol Soc Jpn* **33**, 259–266.
- Fletcher, J., Wayadande, A., Melcher, U. & Ye, F. (1998).** The phytopathogenic mollicute-insect vector interface: a closer look. *Phytopathology* **88**, 1351–1358.
- Fox, G. E., Stackebrandt, E., Hespell, R. B., Gibson, J., Maniloff, J., Dyer, T. A., Wolfe, R. S., Balch, W. E., Tanner, R. S. & other authors (1980).** The phylogeny of prokaryotes. *Science* **209**, 457–463. [Medline](#)
- Frasca, S., Jr, Weber, E. S., Urquhart, H., Liao, X., Gladd, M., Cecchini, K., Hudson, P., May, M., Gast, R. J. & other authors (2005).** Isolation and characterization of *Mycoplasma sphenisci* sp. nov. from the choana of an aquarium-reared jackass penguin (*Spheniscus demersus*). *J Clin Microbiol* **43**, 2976–2979. [Medline](#)
- Fukatsu, T., Tsuchida, T., Nikoh, N. & Koga, R. (2001).** *Spiroplasma* symbiont of the pea aphid, *Acyrtosiphon pisum* (Insecta: Homoptera). *Appl Environ Microbiol* **67**, 1284–1291. [Medline](#)
- Garnier, M., Clerc, M. & Bové, J. M. (1981).** Growth and division of spiroplasmas: morphology of *Spiroplasma citri* during growth in liquid medium. *J Bacteriol* **147**, 642–652. [Medline](#)
- Garnier, M., Clerc, M. & Bové, J. M. (1984).** Growth and division of *Spiroplasma citri*: elongation of elementary helices. *J Bacteriol* **158**, 23–28. [Medline](#)
- Gasparich, G. E., Whitcomb, R. F., Dodge, D., French, F. E., Glass, J. & Williamson, D. L. (2004).** The genus *Spiroplasma* and its non-helical descendants: phylogenetic classification, correlation with phenotype and roots of the *Mycoplasma mycoides* clade. *Int J Syst Evol Microbiol* **54**, 893–918. [Medline](#)
- Glass, J. I., Lefkowitz, E. J., Glass, J. S., Heiner, C. D. R., Chen, E. Y. & Cassell, G. H. (2000).** The complete sequence of the mucosal pathogen *Ureaplasma urealyticum*. *Nature* **407**, 757–762. [Medline](#)
- Grau, O., Laigret, F., Carle, P., Tully, J. G., Rose, D. L. & Bové, J. M. (1991).** Identification of a plant-derived mollicute as a strain of an avian pathogen, *Mycoplasma iowae*, and its implications for mollicute taxonomy. *Int J Syst Bacteriol* **41**, 473–478. [Medline](#)
- Hackett, K. J. & Clark, T. B. (1989).** Ecology of spiroplasmas. In *The Mycoplasmas*, vol. 5, pp. 113–200. Edited by R. F. Whitcomb & J. G. Tully. San Diego: Academic Press.
- Hackett, K. J. & Lynn, D. E. (1985).** Cell-assisted growth of a fastidious spiroplasma. *Science* **230**, 825–827. [Medline](#)
- Hackett, K. J., Lynn, D. E., Williamson, D. L., Ginsberg, A. S. & Whitcomb, R. F. (1986).** Cultivation of the *Drosophila* sex-ratio spiroplasma. *Science* **232**, 1253–1255. [Medline](#)
- Hackett, K. J., Whitcomb, R. F., Clark, T. B., Henegar, R. B., Lynn, D. E., Wagner, A. G., Tully, J. G., Gasparich, G. E., Rose, D. L. & other authors (1996).** *Spiroplasma leptinotarsae* sp. nov., a mollicute uniquely adapted to its host, the Colorado potato beetle, *Leptinotarsa decemlineata* (Coleoptera: Chrysomelidae). *Int J Syst Bacteriol* **46**, 906–911.
- Holben, W. E., Williams, P., Gilbert, M. A., Saarinen, M., Sarkilahti, L. K. & Apajalahti, J. H. (2002).** Phylogenetic analysis of intestinal microflora indicates a novel *Mycoplasma* phylotype in farmed and wild salmon. *Microb Ecol* **44**, 175–185. [Medline](#)
- Hurst, G. D. D. & Jiggins, F. M. (2000).** Male-killing bacteria in insects: mechanisms, incidence, and implications. *Emerg Infect Dis* **6**, 329–336. [Medline](#)
- Hurst, G. D., Graf von der Schulenburg, J. H., Majerus, T. M., Bertrand, D., Zakharov, I. A., Baungard, J., Volkl, W., Stouthamer, R. & Majerus, M. E. (1999).** Invasion of one insect species, *Adalia bipunctata*, by two different male-killing bacteria. *Insect Mol Biol* **8**, 133–139. [Medline](#)
- IRPCM Phytoplasma/Spiroplasma Working Team (2004).** 'Candidatus Phytoplasma', a taxon for the wall-less, non-helical prokaryotes that colonize plant phloem and insects. *Int J Syst Evol Microbiol* **54**, 1243–1255. [Medline](#)
- Jiggins, F. M., Hurst, G. D. D., Jiggins, C. D., von der Schulenburg, J. H. G. & Majerus, M. E. N. (2000).** The butterfly *Danaus chrysippus* is infected by a male-killing *Spiroplasma* bacterium. *Parasitology* **120**, 439–446. [Medline](#)
- Johansson, K.-E. & Pettersson, B. (2002).** Taxonomy of Mollicutes. In *Molecular Biology and Pathogenicity of Mycoplasmas*, pp. 1–29. Edited by S. Razin & R. Herrmann. London: Kluwer.
- Johansson, K.-E., Tully, J. G., Bolske, G. & Pettersson, B. (1999).** *Mycoplasma cavipharyngis* and *Mycoplasma fastidiosum*, the closest relatives to *Eperythrozoon* spp. and *Haemobartonella* spp. *FEMS Microbiol Lett* **174**, 321–326. [Medline](#)
- Kempf, I., Chastel, C., Ferris, S., Dufour-Gesbert, F., Johansson, K.-E., Pettersson, B. & Blanchard, A. (2000).** Isolation of *Mycoplasma columborale* from a fly (*Musca domestica*). *Vet Rec* **147**, 304–305. [Medline](#)
- Kirchhoff, H. (1992).** Motility. In *Mycoplasmas: Molecular Biology and Pathogenesis*, pp. 289–306. Edited by J. Maniloff, R. N. McElhaney, L. R. Finch & J. B. Baseman. Washington, DC: American Society for Microbiology.
- Kirchhoff, H. & Rosengarten, R. (1984).** Isolation of a motile mycoplasma from fish. *J Gen Microbiol* **130**, 2439–2445. [Medline](#)
- Kirchhoff, H., Beyene, P., Fischer, M., Flossdorf, J., Heitmann, J., Khattab, B., Lopatta, D., Rosengarten, R., Seidel, G. & Yousef, C. (1987).** *Mycoplasma mobile* sp. nov., a new species from fish. *Int J Syst Bacteriol* **37**, 192–197.
- Krause, D. C. (1996).** *Mycoplasma pneumoniae* cytodherence: unravelling the tie that binds. *Mol Microbiol* **20**, 247–253. [Medline](#)
- Krause, D. C. (1998).** *Mycoplasma pneumoniae* cytodherence: organization and assembly of the attachment organelle. *Trends Microbiol* **6**, 15–18. [Medline](#)
- Krause, D. C., Proft, T., Hedreyda, C. T., Hilbert, H., Plagens, H. & Herrmann, R. (1997).** Transposon mutagenesis reinforces the correlation between *Mycoplasma pneumoniae* cytoskeletal protein HMW2 and cytodherence. *J Bacteriol* **179**, 2668–2677. [Medline](#)
- Kürner, J., Frangakis, A. S. & Baumeister, W. (2005).** Cryo-electron tomography reveals the cytoskeletal structure of *Spiroplasma melliferum*. *Science* **307**, 436–438. [Medline](#)
- Brown, D. R., Whitcomb, R. F. & Bradbury, J. M. (2007).** Revised minimal standards for description of new species of the class Mollicutes (division Tenericutes). *Int J Syst Evol Microbiol* **57**, 2703–2719.

- Lim, P.-O. & Sears, B. B. (1992). Evolutionary relationships of plant-pathogenic mycoplasma-like organisms and *Acholeplasma laidlawii* deduced from two ribosomal protein gene sequences. *J Bacteriol* **174**, 2606–2611. [Medline](#)
- List Editor, IJSEM (2002). Notification that new names and new combinations have appeared in volume 52, part 2, of the IJSEM (footnote, p. 692). *Int J Syst Evol Microbiol* **52**, 691–692.
- Lo, S. C., Hayes, M. M., Tully, J. G., Wang, Y.-H., Kotanai, H., Pierce, P. F., Rose, D. L. & Shih, J. W.-K. (1992). *Mycoplasma penetrans* sp. nov. from the urogenital tract of patients with AIDS. *Int J Syst Bacteriol* **42**, 357–364. [Medline](#)
- Maniloff, J. (2002). Phylogeny and evolution. In *Molecular Biology and Pathogenicity of Mycoplasmas*, pp. 31–43. Edited by S. Razin & R. Herrmann. London: Kluwer.
- Martin, H. H., Schilf, W. & Schiefer, H.-G. (1980). Differentiation of *Mycoplasma* from bacterial protoplast L-forms by assay for penicillin-binding proteins. *Arch Microbiol* **127**, 297–299. [Medline](#)
- McCoy, R. E., Caudwell, A., Chang, C. J., Chen, T. A., Golino, D. A., Hackett, K. J., Kirkpatrick, B. C., Marwitz, R., Petzold, H. & other authors (1989). Plant diseases associated with mycoplasma-like organisms. In *The Mycoplasmas*, vol. 5, pp. 545–640. Edited by R. F. Whitcomb & J. G. Tully. San Diego: Academic Press.
- Melcher, U., Sha, Y., Ye, F. & Fletcher, J. (1999). Mechanisms of spiroplasma genome variation associated with SpV1-like viral DNA inferred from sequence comparisons. *Microb Comp Genomics* **4**, 29–46. [Medline](#)
- Miyata, M. & Seto, S. (1999). Cell reproduction cycle of mycoplasma. *Biochimie* **81**, 873–878. [Medline](#)
- Miyata, M., Yamamoto, H., Shimizu, T., Uenoyama, A., Citti, C. & Rosengarten, R. (2000). Gliding mutants of *Mycoplasma mobile*, relationships between motility and cell morphology, cell adhesion and microcolony formation. *Microbiology* **146**, 1311–1320. [Medline](#)
- Miyata, M., Ryu, W. S. & Berg, H. C. (2002). Force and velocity of *Mycoplasma mobile* gliding. *J Bacteriol* **184**, 1827–1831. [Medline](#)
- Murray, R. G. E. & Stackebrandt, E. (1995). Taxonomic note: implementation of the provisional status *Candidatus* for incompletely described prokaryotes. *Int J Syst Bacteriol* **45**, 186–187. [Medline](#)
- Neimark, H. & Kocan, K. M. (1997). The cell wall-less rickettsia *Eperythrozoon wenyonii* is a *Mycoplasma*. *FEMS Microbiol Lett* **156**, 287–291. [Medline](#)
- Neimark, H., Mitchelmore, D. & Leach, R. H. (1998). An approach to characterizing uncultivated prokaryotes, the Grey Lung agent and proposal of a '*Candidatus* Mycoplasma ravipulmonis'. *Int J Syst Bacteriol* **48**, 389–394. [Medline](#)
- Neimark, H., Johansson, K.-E., Rikihisa, Y. & Tully, J. G. (2001). Proposal to transfer some members of the genera *Haemobartonella* and *Eperythrozoon* to the genus *Mycoplasma* with descriptions of '*Candidatus* Mycoplasma haemofelis', '*Candidatus* Mycoplasma haemomuris', '*Candidatus* Mycoplasma haemosuis' and '*Candidatus* Mycoplasma wenyonii'. *Int J Syst Evol Microbiol* **51**, 891–899. [Medline](#)
- Neimark, H., Barnaud, A., Gounon, P., Michel, J. C. & Contamin, H. (2002a). The putative haemobartonella that influences *Plasmodium falciparum* parasitaemia in squirrel monkeys is a haemotrophic mycoplasma. *Microbes Infect* **4**, 693–698. [Medline](#)
- Neimark, H., Johansson, K.-E., Rikihisa, Y. & Tully, J. G. (2002b). Revision of haemotrophic *Mycoplasma* species names. *Int J Syst Evol Microbiol* **52**, 683. [Medline](#)
- Brown, D. R., Whitcomb, R. F. & Bradbury, J. M. (2007). Revised minimal standards for description of new species of the class *Mollicutes* (division *Tenericutes*). *Int J Syst Evol Microbiol* **57**, 2703–2719.
- Nunan, L. M., Lightner, D. V., Odouri, M. & Gasparich, G. E. (2005). *Spiroplasma penaei* sp. nov., associated with mortalities in *Penaeus vannamei*, Pacific white shrimp. *Int J Syst Evol Microbiol* **55**, 2317–2322. [Medline](#)
- Nur, I., Glaser, G. & Razin, S. (1986). Free and integrated plasmid DNA in spiroplasmas. *Curr Microbiol* **14**, 169–176.
- Nur, I., LeBlanc, D. & Tully, J. G. (1987). Short, interspersed and repetitive DNA sequences in *Spiroplasma* species. *Plasmid* **17**, 110–116. [Medline](#)
- Oshima, K., Kazikawa, S., Nishigawa, H., Jung, H. Y., Wei, W., Suzuki, S., Arashida, R., Nakata, D., Miyata, S. & other authors (2004). Reductive evolution suggested from the complete genome sequence of a plant-pathogenic phytoplasma. *Nat Genet* **36**, 27–29. [Medline](#)
- Peterson, J. E., Rodwell, A. W. & Rodwell, E. S. (1973). Occurrence and ultrastructure of a variant (rho) form of *Mycoplasma*. *J Bacteriol* **115**, 411–425. [Medline](#)
- Pitcher, D. G. & Nicholas, R. A. J. (2005). Mycoplasma host specificity: fact or fiction? *Vet J* **170**, 300–306. [Medline](#)
- Plackett, P. (1959). On the probable absence of "muco-complex" from *Mycoplasma mycoides*. *Biochim Biophys Acta* **35**, 260–262. [Medline](#)
- Pollack, J. D. (1992). Carbohydrate metabolism and energy conservation. In *Mycoplasmas: Molecular Biology and Pathogenesis*, pp. 181–200. Edited by J. Maniloff, R. N. McElhaney, L. R. Finch & J. B. Baseman. Washington, DC: American Society for Microbiology.
- Pollack, J. D., Williams, M. V. & McElhaney, R. N. (1997). The comparative metabolism of the mollicutes (mycoplasmas), the utility for taxonomic classification and the relationship of putative gene annotation and phylogeny to enzymatic function. *Crit Rev Microbiol* **23**, 269–354. [Medline](#)
- Razin, S. (1983). Urea hydrolysis. In *Methods in Mycoplasmaology*, vol. 1, pp. 351–353. Edited by S. Razin & J. G. Tully. New York: Academic Press.
- Razin, S. (1998). Molecular biology and pathogenicity of mycoplasmas. *Microbiol Mol Biol Rev* **62**, 1094–1156. [Medline](#)
- Razin, S. & Barile, M. F. (editors) (1985). *Mycoplasma Pathogenicity*. New York: Academic Press.
- Razin, S. & Jacobs, E. (1992). Mycoplasma adhesion. *J Gen Microbiol* **128**, 407–422.
- Renaudin, J. (2002). Extrachromosomal elements and gene transfer. In *Molecular Biology and Pathogenicity of Mycoplasmas*, pp. 347–370. Edited by S. Razin & R. Herrmann. London: Kluwer.
- Renaudin, J. & Bové, J. M. (1994). SpV1 and SpV4, spiroplasma viruses with circular, single-stranded DNA genomes and their contribution to the molecular biology of spiroplasmas. *Adv Virus Res* **44**, 429–463. [Medline](#)
- Renaudin, J., Pascarel, M. C., Saillard, C., Chevalier, C. & Bové, J. M. (1986). Chez les spiroplasmes le codon UGA n'est pas non sens et semble coder pour le tryptophane. *C R Acad Sci III* **303**, 539–540 (in French).
- Robertson, J. A., Pyle, L. E., Stemke, G. W. & Finch, L. R. (1990). Human ureaplasmas show diverse genome sizes by pulsed-field electrophoresis. *Nucleic Acids Res* **18**, 1451–1455. [Medline](#)
- Robinson, I. M. (1983). Culture media for anaeroplasmas. In *Methods in Mycoplasmaology*, vol. 1, pp. 159–162. Edited by S. Razin & J. G. Tully. New York: Academic Press.
- Robinson, I. M. & Freundt, E. A. (1987). Proposal for an amended classification of anaerobic mollicutes. *Int J Syst Bacteriol* **37**, 78–81.

- Robinson, I. M., Allison, M. J. & Hartman, P. A. (1975).** *Anaeroplasma abactoclasticum* gen. nov., sp. nov.: an obligately anaerobic mycoplasma from the rumen. *Int J Syst Bacteriol* **25**, 173–181.
- Rocha, E. P., Danchin, A. & Viari, A. (1999).** Translation in *Bacillus subtilis*: roles and trends of initiation and termination, insights from a genome analysis. *Nucleic Acids Res* **27**, 3567–3576. [Medline](#)
- Rodwell, A. W., Peterson, J. E. & Rodwell, E. S. (1975).** Striated fibers of the rho form of mycoplasmas, in vitro reassembly, composition and structure. *J Bacteriol* **122**, 1216–1229. [Medline](#)
- Rose, D. L., Tully, J. G., Bové, J. M. & Whitcomb, R. F. (1993).** A test for measuring growth responses of mollicutes to serum and polyoxyethylene sorbitan. *Int J Syst Bacteriol* **43**, 527–532. [Medline](#)
- Saillard, C., Vignault, J. C., Bové, J. M., Raie, A., Tully, J. G., Williamson, D. L., Fos, A., Garnier, M., Gadeau, A. & other authors (1987).** *Spiroplasma phoeniceum* sp. nov., a new plant-pathogenic species from Syria. *Int J Syst Bacteriol* **37**, 106–115.
- Schleifer, K.-H. & Kandler, O. (1972).** Peptidoglycan types of bacterial cell walls and their taxonomic implications. *Bacteriol Rev* **36**, 407–477. [Medline](#)
- Sears, B. B. & Kirkpatrick, B. C. (1994).** Unveiling the evolutionary relationships of plant pathogenic mycoplasma-like organisms. *ASM News* **60**, 307–312.
- Shaevitz, J. W., Lee, J. Y. & Fletcher, D. A. (2005).** Spiroplasma swim by a processive change in body helicity. *Cell* **122**, 941–945. [Medline](#)
- Shimizu, T. & Miyata, M. (2002).** Electron microscopic studies of three gliding mycoplasmas, *Mycoplasma mobile*, *M. pneumoniae*, and *M. gallisepticum*, by using the freeze-substitution technique. *Curr Microbiol* **44**, 431–434. [Medline](#)
- Smith, D. G., Russell, W. C., Ingledew, W. J. & Thirkell, D. (1993).** Hydrolysis of urea by *Ureaplasma urealyticum* generates a transmembrane potential with resultant ATP synthesis. *J Bacteriol* **175**, 3253–3258. [Medline](#)
- Stevens, M. K. & Krause, D. C. (1992).** *Mycoplasma pneumoniae* cytoadherence phase-variable protein HMW3 is a component of the attachment organelle. *J Bacteriol* **174**, 4265–4274. [Medline](#)
- Taylor, R. R., Varsani, H. & Miles, R. J. (1994).** Alternatives to arginine as energy sources for the non-fermentative *Mycoplasma gallinarum*. *FEMS Microbiol Lett* **115**, 163–168. [Medline](#)
- Trachtenberg, S. (1998).** Mollicutes – wall-less bacteria with internal cytoskeletons. *J Struct Biol* **124**, 244–256. [Medline](#)
- Trachtenberg, S. (2004).** Shaping and moving a *Spiroplasma*. *J Mol Microbiol Biotechnol* **7**, 78–87. [Medline](#)
- Trachtenberg, S. & Gilad, R. (2001).** A bacterial linear motor, cellular and molecular organization of the contractile cytoskeleton of the helical bacterium *Spiroplasma melliferum* BC3. *Mol Microbiol* **41**, 827–848. [Medline](#)
- Tully, J. G. (1983c).** Dark-field microscopy. In *Methods in Mycoplasmaology*, vol. 1, pp. 35–37. Edited by S. Razin & J. G. Tully. New York: Academic Press.
- Tully, J. G., Bové, J. M., Laigret, F. & Whitcomb, R. F. (1993).** Revised taxonomy of the class *Mollicutes*: proposed elevation of a monophyletic cluster of arthropod-associated mollicutes to ordinal rank (*Entomoplasmatales* ord. nov.), with provision for familial rank to separate species with nonhelical morphology (*Entomoplasmataceae* fam. nov.) from helical species (*Spiroplasmataceae*) and emended description of the order *Mycoplasmatales*, family *Mycoplasmasmataceae*. *Int J Syst Bacteriol* **43**, 378–385.
- Wang, W., Wen, B., Gasparich, G. E., Zhu, N., Rong, L., Chen, J. & Xu, Z. (2004).** A spiroplasma associated with tremor disease in the Chinese mitten crab (*Eriocheir sinensis*). *Microbiology* **150**, 3035–3040. [Medline](#)
- Wang, W., Gu, W., Ding, Z., Ren, Y., Chen, J. & Hou, Y. (2005).** A novel *Spiroplasma* pathogen causing systemic infection in the crayfish *Procambarus clarkii* (Crustacea: Decapoda), in China. *FEMS Microbiol Lett* **249**, 131–137. [Medline](#)
- Weisburg, W. G., Tully, J. G., Rose, D. L., Petzel, J. P., Oyaizu, H., Yang, D., Mandelco, L., Sechrest, J., Lawrence, T. G. & other authors (1989).** A phylogenetic analysis of the mycoplasmas: basis for their classification. *J Bacteriol* **171**, 6455–6467. [Medline](#)
- Whitcomb, R. F. & Tully, J. G. (editors) (1979).** *The Mycoplasmas*, vol. III, *Plant and Insect Mycoplasmas*. New York: Academic Press.
- Whitcomb, R. F. & Tully, J. G. (editors) (1989).** *The Mycoplasmas: Spiroplasma, Acholeplasma, and Mycoplasmas of Plants and Arthropods*. New York: Academic Press.
- Whitcomb, R. F. & Williamson, D. L. (1975).** Helical wall-free prokaryotes in insects: multiplication and pathogenicity. *Ann N Y Acad Sci* **266**, 260–275. [Medline](#)
- Williamson, D. L. (1974).** Unusual fibrils from the spirochete-like sex ratio organism. *J Bacteriol* **117**, 904–906. [Medline](#)
- Williamson, D. L. & Poulson, D. F. (1979).** Sex ratio organisms (spiroplasma) of *Drosophila*. In *The Mycoplasmas*, vol. 3, pp. 175–208. Edited by R. F. Whitcomb & J. G. Tully. New York: Academic Press.
- Williamson, D. L. & Whitcomb, R. F. (1974).** Helical, wall-free prokaryotes in *Drosophila*, leafhoppers, and plants. *Colloq Inst Natl Sante Rech Med* **33**, 283–290.
- Williamson, D. L. & Whitcomb, R. F. (1975).** Plant mycoplasmas: a cultivable spiroplasma causes corn stunt disease. *Science* **188**, 1018–1020. [Medline](#)
- Williamson, D. L., Brink, P. R. & Zieve, G. W. (1984).** Spiroplasma fibrils. *Isr J Med Sci* **20**, 830–835. [Medline](#)
- Williamson, D. L., Tully, J. G. & Whitcomb, R. F. (1989).** The genus *Spiroplasma*. In *The Mycoplasmas*, vol. 5, pp. 71–111. Edited by R. F. Whitcomb & J. G. Tully. San Diego: Academic Press.
- Williamson, D. L., Whitcomb, R. F., Tully, J. G., Gasparich, G. E., Rose, D. L., Carle, P., Bové, J. M., Hackett, K. J., Adams, J. R. & other authors (1998).** Revised group classification of the genus *Spiroplasma*. *Int J Syst Bacteriol* **48**, 1–12. [Medline](#)
- Woese, C. R., Maniloff, J. & Zablen, L. B. (1980).** Phylogenetic analysis of the mycoplasmas. *Proc Natl Acad Sci U S A* **77**, 494–498. [Medline](#)
- Wolgemuth, C. W. & Charon, N. W. (2005).** The kinky propulsion of *Spiroplasma*. *Cell* **122**, 827–828. [Medline](#)
- Yamao, F., Muto, A., Kawauchi, Y., Iwami, M., Iwagami, S., Azumi, V. & Osawa, S. (1985).** UGA is read as tryptophan in *Mycoplasma capricolum*. *Proc Natl Acad Sci U S A* **82**, 2306–2309. [Medline](#)

**Brown, D. R., Whitcomb, R. F. & Bradbury, J. M. (2007).** Revised minimal standards for description of new species of the class *Mollicutes* (division *Tenericutes*). *Int J Syst Evol Microbiol* **57**, 2703–2719.
